# Supplementary material
Source: PubMed Central journal article supplement (PMC4364199)
Supplement: pnas.201501364SI.pdf [file pnas.201501364SI.pdf]

# Supporting Information

Shen et al. 10.1073/pnas.1501364112

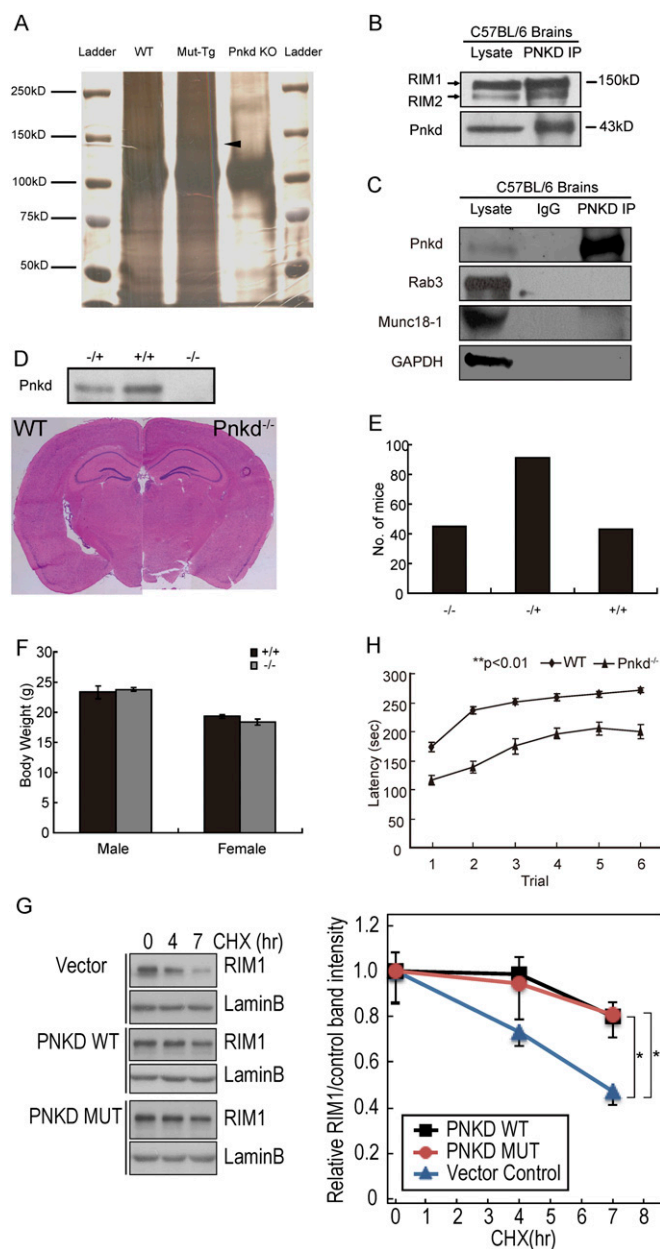

**Fig. S1.** (A) Silverstaining of Pnkd coimmunoprecipitation. Coimmunoprecipitation using a rabbit anti-PNKD antibody in mouse brain lysates from wild-type (Left), mut-Tg (Center), and Pnkd<sup>-/-</sup> (Right) mice. The arrowhead indicates an ~150-kD band in wild-type and mut-Tg samples that is absent in the Pnkd<sup>-/-</sup> sample. (B) RIM1 and RIM2 coimmunoprecipitated with PNKD. C57BL/6 mouse frontal cortex lysates were incubated with a rabbit anti-PNKD antibody. Lysate (Left) and the immunoprecipitation eluant (Right) were blotted with anti-PNKD or a nonspecific anti-RIMS antibodies. (C) C57BL/6 mouse frontal cortex homogenates were incubated with rabbit IgG or anti-PNKD antibody. Rab3 and Munc18-1 were not pulled down by Pnkd. (D) Immunoblot of Pnkd in adult wild-type, PNKD KO, PNKD heterozygous littermates mice frontal cortex homogenates, and H&E staining of adult wild-type (Left) and PNKD KO mouse brain coronal section (Right). (E) The ratio of genotypes of pups generated by a Pnkd<sup>+/-</sup> intercross was the expected 1:2:1. Data represent a total of ~180 newborn pups. (F) Weights of 9-wk-old male and female mice were not significantly different between genotypes ( $n \geq 10$  for each genotype). (G) RIM1 protein stability was increased by PNKD in SH-SY5S cells. Error bars indicate SEs ( $*P < 0.05$ , Student's  $t$  test,  $n = 3$ ). LaminB was used as internal control. (H) Latency to fall was shorter in Pnkd<sup>-/-</sup> mice vs. wild-type at all time points ( $**P < 0.01$ , Student's  $t$  test). Error bars indicate SEs. (WT,  $n = 11$ ; Pnkd<sup>-/-</sup> mice,  $n = 7$ ).

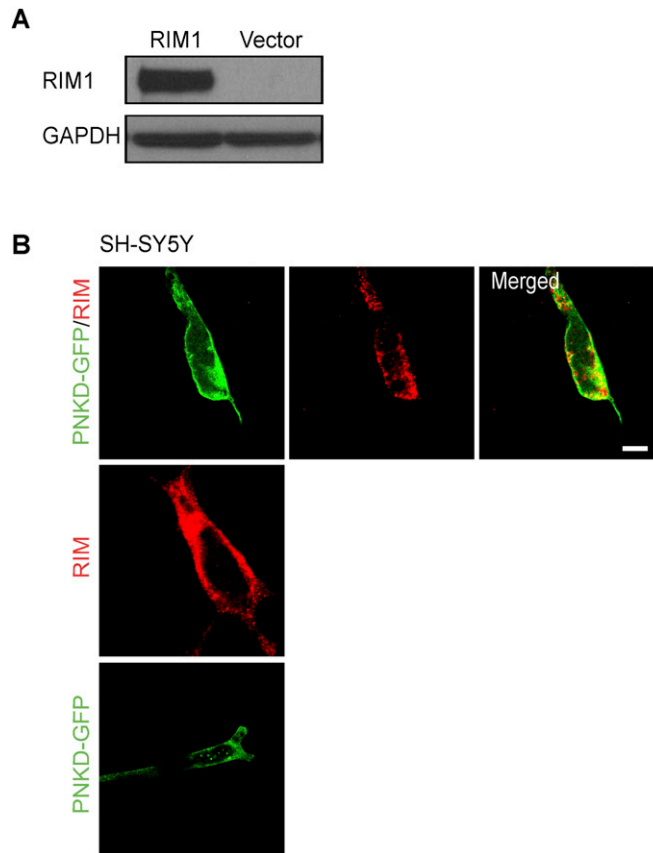

**Fig. S2.** Expression of PNKD and RIM1 in SH-SY5Y cells. (A) Cells were transfected with empty vector or RIM1 expression vector and cell lysates were blotted with anti-RIM and anti-GAPDH antibodies. There was no detectable endogenous RIM protein in SH-SY5Y cells transfected with empty vector. (B) Cells were cotransfected with PNKD-GFP and RIM1 expression vectors. RIM1 proteins were immunostained with an anti-RIM antibody. PNKD and RIM1 partially colocalized near the cell membrane. (Scale bar, 10  $\mu$ m.)



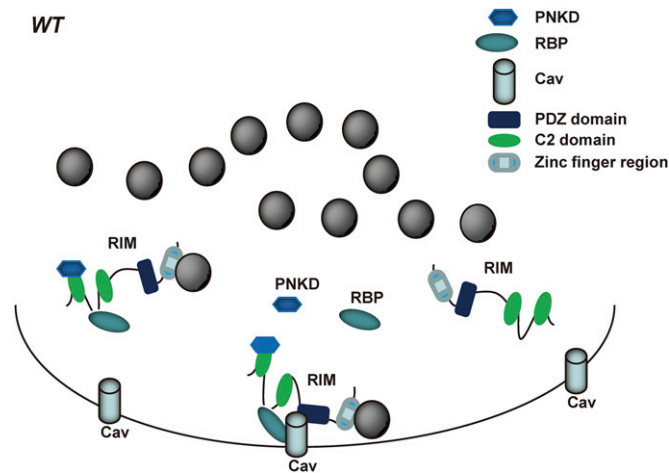

**Fig. S4.** Model of PNKD function in synapses. In wild-type mice, RIMs interact directly with voltage-gated calcium channels on the presynaptic membrane via RIM binding protein (RBP) and to synaptic vesicles via Rab3. PNKD interacts with RIMs and inhibits neurotransmitter release. When both RIM1 and RIM2 are genetically ablated, calcium triggered spontaneous neurotransmitter release is severely reduced (1). Mutations in PNKD and voltage-gated calcium channel subunits resulted in paroxysmal dyskinesia in humans and mice, respectively.

1. Schoch S, et al. (2006) Redundant functions of RIM1alpha and RIM2alpha in Ca(2+)-triggered neurotransmitter release. *EMBO J* 25(24):5852–5863.

**Table S1. Candidate proteins identified by mass spectrometry**

| Protein name                                                                        | Molecular weight, kDa | Hits | Rank |
|-------------------------------------------------------------------------------------|-----------------------|------|------|
| Regulating synaptic membrane exocytosis protein 2/Rab3-interacting molecule 2, RIM2 | 176                   | 14   | 1    |
| Ankyrin repeat domain-containing protein 27                                         | 117                   | 13   | 2    |
| Actin, cytoplasmic 2                                                                | 42                    | 7    | 3    |
| Protein NipSnap3A                                                                   | 28                    | 6    | 4    |
| TRIO and F-actin-binding protein                                                    | 223                   | 13   | 5    |
| Myosin-11                                                                           | 227                   | 14   | 6    |
| Sentrin-specific protease 6                                                         | 127                   | 12   | 7    |
| SH3 and multiple ankyrin repeat domains protein 2                                   | 159                   | 11   | 8    |
| Programmed cell death 1 ligand 2                                                    | 26                    | 7    | 9    |
| Orphan nuclear receptor NR1D2                                                       | 64                    | 9    | 10   |
| Periplakin                                                                          | 204                   | 13   | 11   |
| Structural maintenance of chromosomes protein 1A                                    | 143                   | 12   | 12   |
| IFN-activable protein 204                                                           | 72                    | 8    | 13   |
| Myosin-9                                                                            | 226                   | 12   | 14   |
| Structural maintenance of chromosomes protein 1A                                    | 143                   | 11   | 15   |
| Tuberin                                                                             | 201                   | 12   | 16   |
| Guanine nucleotide-binding protein G(q) subunit alpha                               | 41                    | 6    | 17   |
| Oxysterol-binding protein-related protein 3                                         | 97                    | 9    | 18   |
| DNA polymerase alpha catalytic subunit                                              | 165                   | 11   | 19   |
| Intraflagellar transport 81                                                         | 79                    | 9    | 20   |

Pnkd was immunoprecipitated from mouse frontal cortex lysates as described in *Experimental Procedures*. Proteins pulled down by Pnkd were visualized by silverstaining and multiple bands observed in wild-type and mut-Tg samples but not in PNKD KO samples were collected, in-gel digested, and analyzed by MS/MS. Proteins are identified using UniProtKB/Swiss-Prot ([www.uniprot.org/uniprot/](http://www.uniprot.org/uniprot/), Release 53.3, July 2007) and ranked according to their score. The numbers in the Hits columns refer to the number of unique peptides identified in the experiment. Common contaminants (human keratins, porcine trypsin) were removed from the dataset.
